# Supplementary material for: Activation of AKR1C1/ERβ induces apoptosis by downregulation of c-FLIP in prostate cancer cells: A prospective therapeutic opportunity
Source: PubMed Central journal article supplement (PMC4484479; doi:10.18632/oncotarget.3417), 2015-03-24
Supplement: oncotarget-06-11600-s001.pdf [file oncotarget-06-11600-s001.pdf]

## SUPPLEMENTARY FIGURE

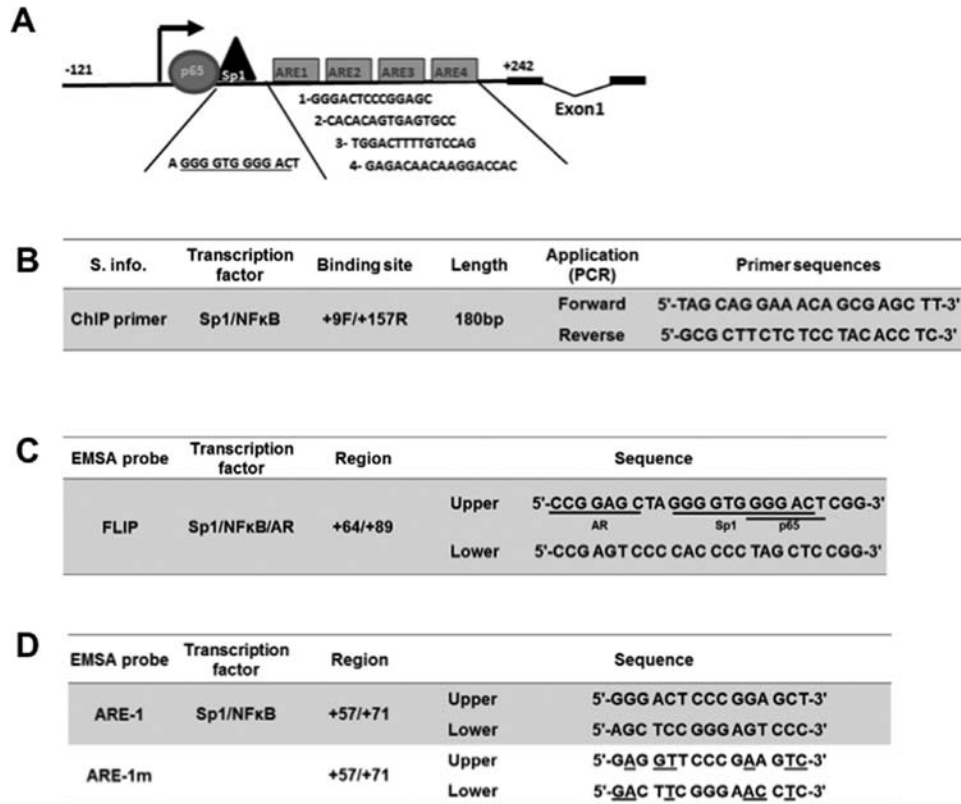

Supplementary Figure S1: A. Schematic representation of potential transcription factor binding sites on the c-FLIP promoter (-121/+242) predicted by Genomatrix program. B. Primer sequences used for ChIP. C. and D. Oligonucleotide sequence of c-FLIP sequence, and c-FLIP ARE-1 sequence used in EMSA.
